# Supplementary material for: A kinetic and mechanistic study of analogous bifunctional dialkylamine platinum(ii) complexes
Source: Royal Society of Chemistry journal article supplement (doi:10.1039/d0nj00108b), 2020-01-01
Supplement: d0nj00108b1.pdf [file d0nj00108b1.pdf]

## A Kinetic and Mechanistic Study of Analogous Bifunctional Dialkylamine Platinum(II) Complexes

Moses Ariyo Olusegun<sup>\*a</sup>, Desigan Reddy<sup>a</sup> and Deogratius Jaganyi<sup>b,c</sup>

New Journal of Chemistry, The Royal Society of Chemistry

### Electronic Supporting Information (ESI)

The available ESI includes several Mass and NMR spectra, elemental analysis, wavelengths for kinetic measurements, concentration dependence and Eyring plots for determination of second order rate constant and activation parameters.

#### Elemental Composition Report

Page 1

#### Single Mass Analysis

Tolerance = 5.0 PPM / DBE: min = -1.5, max = 50.0

Element prediction: Off

Number of isotope peaks used for i-FIT = 2

Monoisotopic Mass, Even Electron Ions

28 formula(e) evaluated with 1 results within limits (up to 20 best isotopic matches for each mass)

Elements Used:

C: 0-5 H: 5-10 N: 0-3 Na: 1-1 35Cl: 0-1 37Cl: 0-1 194Pt: 0-1

cPtM 2711 54 (1.787) Cm (1:61)

TOF MS ES+

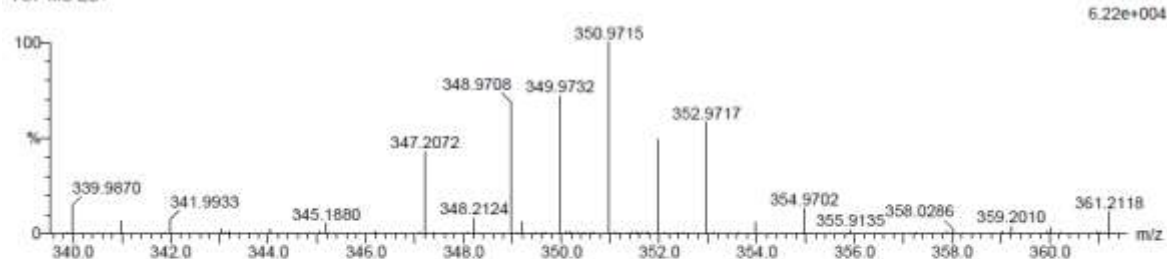

|          |            |      |      |      |       |              |                              |  |
|----------|------------|------|------|------|-------|--------------|------------------------------|--|
| Minimum: |            |      |      | -1.5 |       |              |                              |  |
| Maximum: |            | 5.0  | 5.0  | 50.0 |       |              |                              |  |
| Mass     | Calc. Mass | mDa  | PPM  | DBE  | i-FIT | i-FIT (Norm) | Formula                      |  |
| 350.9715 | 350.9716   | -0.1 | -0.3 | -1.5 | 135.4 | 0.0          | C2 H10 N2 Na 35Cl 37Cl 194Pt |  |

Fig. S1 Mass spectrum of cPtM

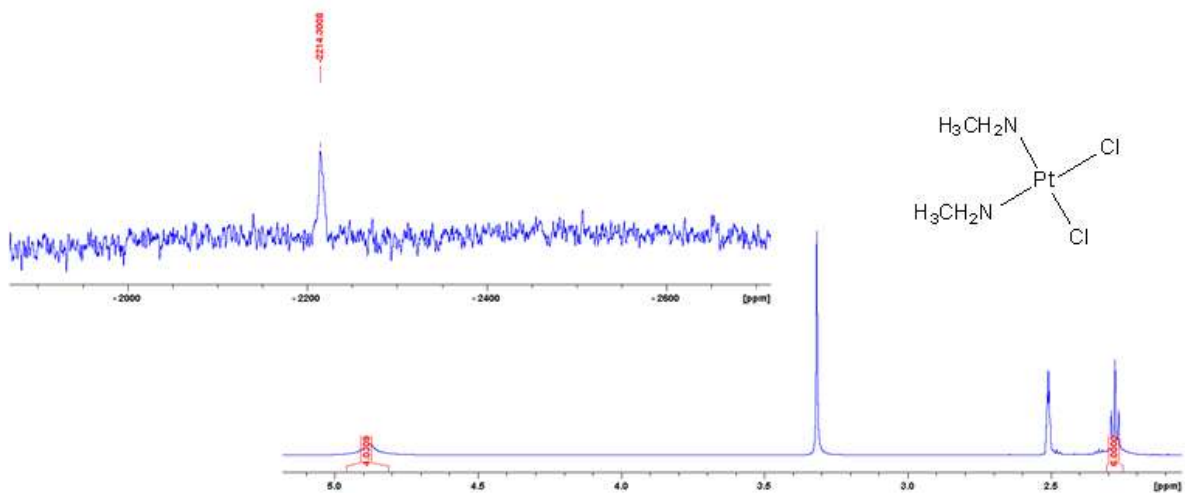

Fig. S2  $^1\text{H}$ NMR and  $^{195}\text{Pt}$ NMR of cPtM

Elemental Composition Report

Single Mass Analysis

Tolerance = 5.0 PPM / DBE: min = -1.5, max = 50.0

Element prediction: Off

Number of isotope peaks used for i-FIT = 2

Monoisotopic Mass, Even Electron Ions

60 formula(e) evaluated with 1 results within limits (up to 20 best isotopic matches for each mass)

Elements Used:

C: 6-6 H: 15-20 N: 0-5 Na: 1-1  $^{35}\text{Cl}$ : 0-2  $^{37}\text{Cl}$ : 1-2  $^{194}\text{Pt}$ : 0-1

cPTR 2711 2 (0.034) Cm (1.51)

TOF MS ES+

5.65e+004

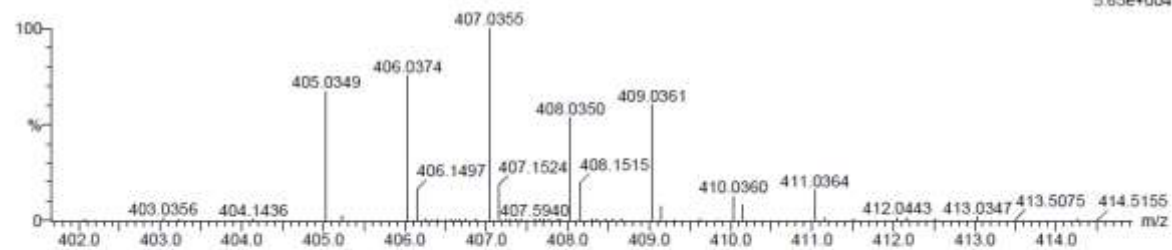

Minimum:

Maximum:

5.0 5.0 -1.5

Mass Calc. Mass mDa PPM DBE i-FIT i-FIT (Norm) Formula

407.0355 407.0342 1.3 3.2 -1.5 214.5 0.0 C6 H10 N2 Na 35Cl 37Cl 194Pt

Fig. S3 Mass spectrum for cPtR

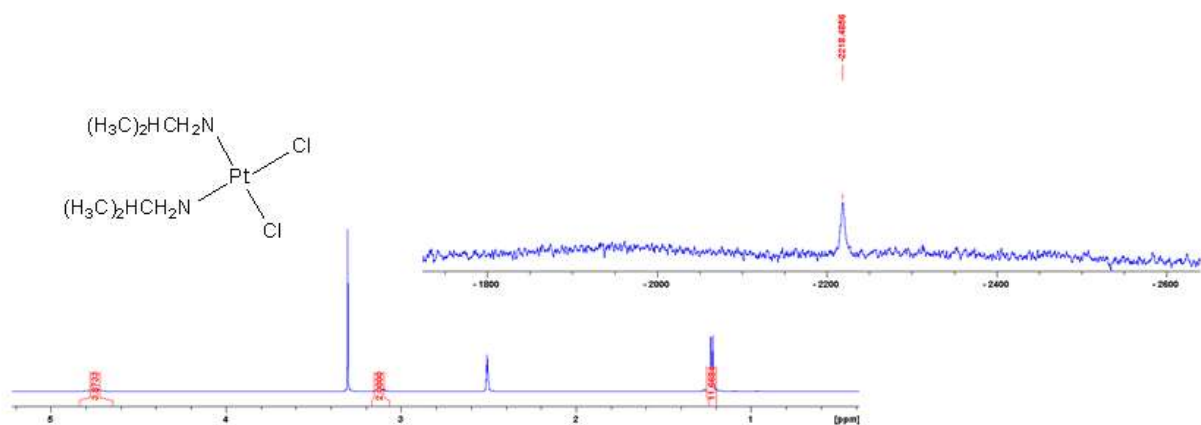

Fig. S4 <sup>1</sup>H NMR and <sup>195</sup>Pt NMR of cPtR

### Elemental Composition Report

Page 1

#### Single Mass Analysis

Tolerance = 5.0 PPM / DBE: min = -1.5, max = 50.0

Element prediction: Off

Number of isotope peaks used for i-FIT = 2

Monoisotopic Mass, Odd and Even Electron Ions

29 formula(e) evaluated with 1 results within limits (up to 20 closest results for each mass)

Elements Used:

C: 0-5 H: 5-10 N: 0-5 Cl: 0-2 194Pt: 0-1

IPMa 0512 31 (1.013) Cm (1.61)

TOF MS ES+

3.39e+004

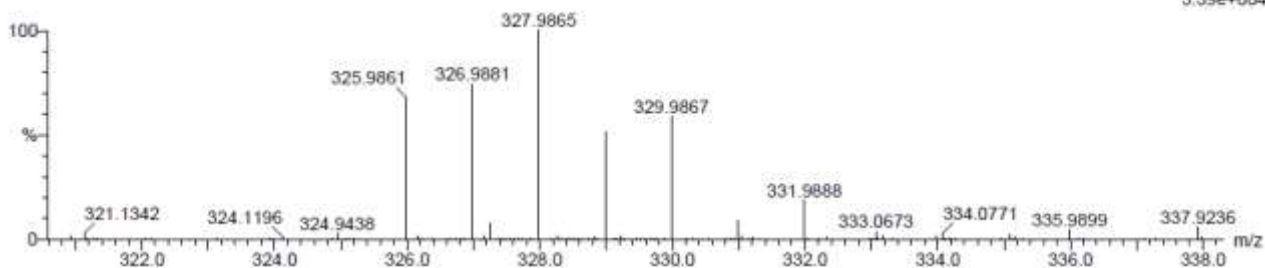

| Mass     | Calc. Mass | mDa | PPM | DBE  | i-FIT | i-FIT (Norm) | Formula             |
|----------|------------|-----|-----|------|-------|--------------|---------------------|
| 325.9861 | 325.9848   | 1.3 | 4.0 | -1.0 | 152.7 | 0.0          | C2 H10 N2 Cl2 194Pt |

Fig. S5 Mass spectrum for tPtM

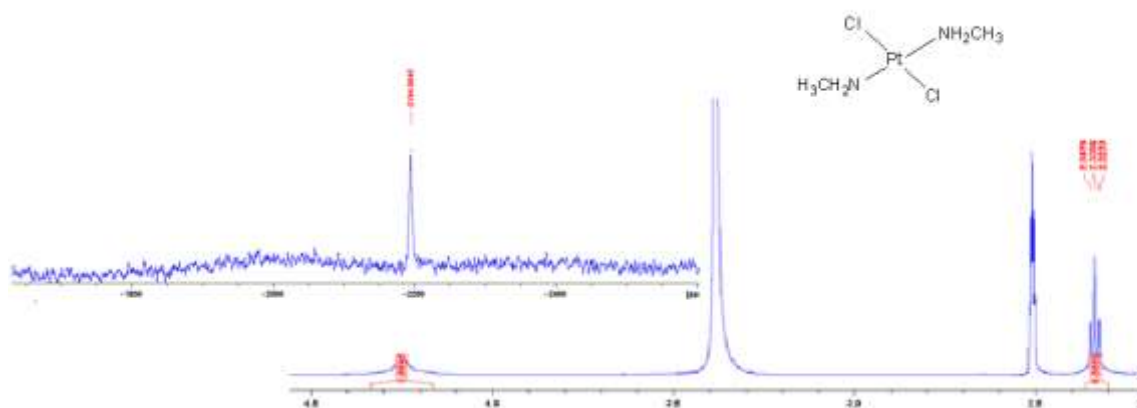

Fig. S6  $^1\text{H}$ NMR and  $^{195}\text{Pt}$ NMR of tPtM

### Elemental Composition Report

Page 1

#### Single Mass Analysis

Tolerance = 5.0 PPM / DBE: min = -1.5, max = 50.0

Element prediction: Off

Number of isotope peaks used for i-FIT = 2

Monoisotopic Mass, Even Electron Ions

27 formula(e) evaluated with 1 results within limits (up to 20 closest results for each mass)

Elements Used:

C: 5-10 H: 15-20 N: 0-5 Na: 1-1 Cl: 0-2  $^{194}\text{Pt}$ : 0-1

IPTR 0512 60 (1.990) Cm (1.61)

TOF MS ES+

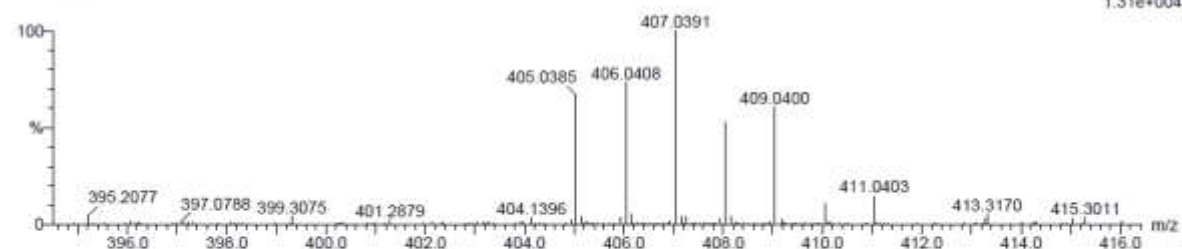

Minimum:

Maximum: 5.0 5.0 -1.5

| Mass     | Calc. Mass | mDa | PPM | DBE  | i-FIT | i-FIT (Norm) | Formula                               |
|----------|------------|-----|-----|------|-------|--------------|---------------------------------------|
| 405.0385 | 405.0372   | 1.3 | 3.2 | -1.5 | 101.5 | 0.0          | C6 H18 N2 Na Cl2<br>$^{194}\text{Pt}$ |

Fig. S7 Mass spectrum for tPtR

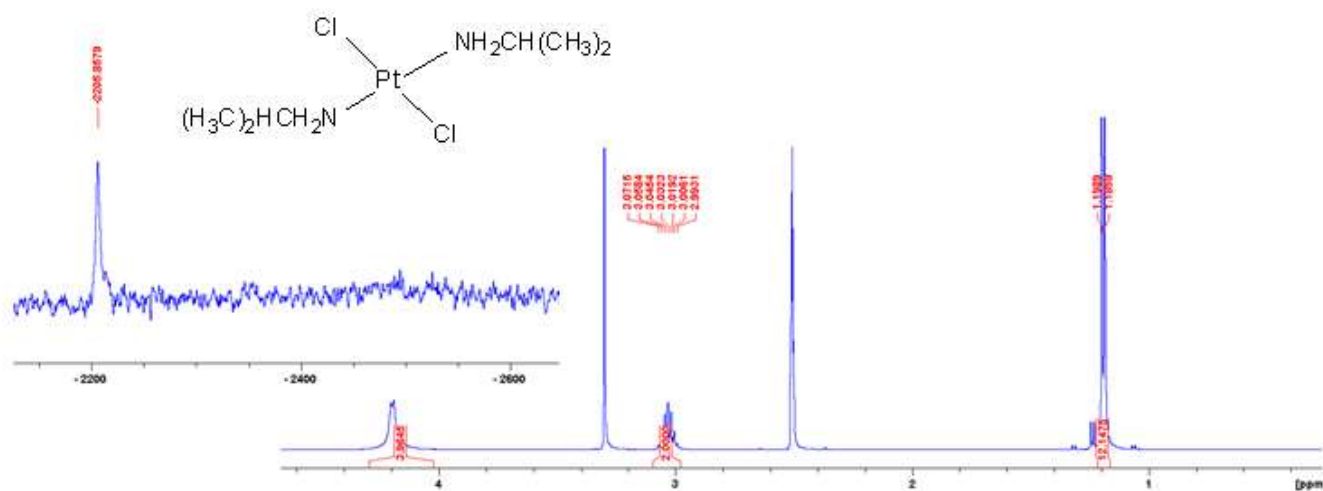

Fig. S8  $^1\text{H}$ NMR and  $^{195}\text{Pt}$ NMR of tPtR

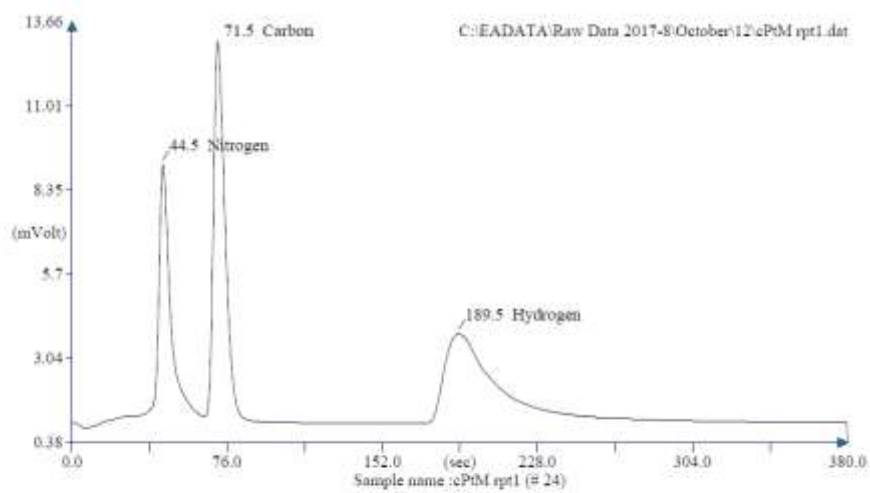

| Retention Time (min) | Element Name | Element % |
|----------------------|--------------|-----------|
| 0.742                | Nitrogen     | 5.294     |
| 1.192                | Carbon       | 7.270     |
| 3.158                | Hydrogen     | 2.795     |
|                      |              | 15.359    |

Fig. S9 Elemental analysis of cPtM

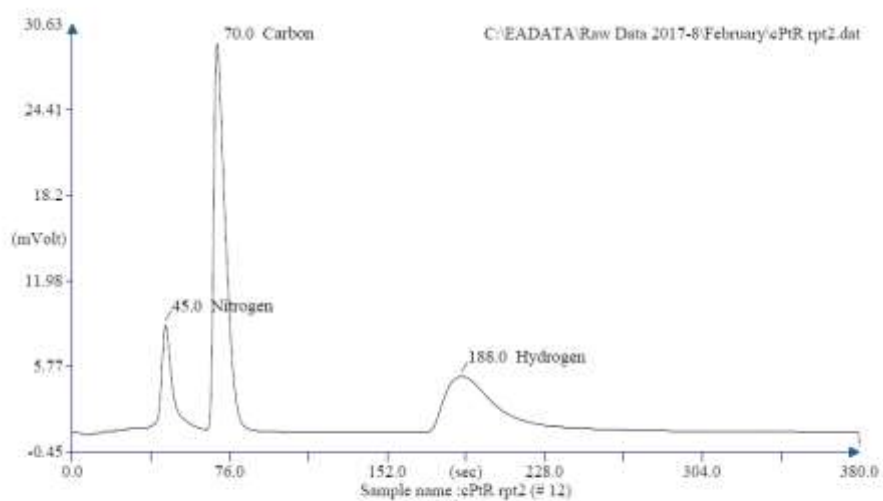

| Retention Time<br>(min) | Element Name | Element % |
|-------------------------|--------------|-----------|
| 0.750                   | Nitrogen     | 7.615     |
| 1.167                   | Carbon       | 18.542    |
| 3.133                   | Hydrogen     | 4.444     |
|                         |              | 30.601    |

**Fig. S10** Elemental analysis of cPtR

**Table S1** Wavelengths for kinetic measurements used in the study

| Complex | Nucleophile | Wavelength( $\lambda$ )<br>Stopped-flow(nm) |
|---------|-------------|---------------------------------------------|
| cPt     | TU          | 340                                         |
|         | DMTU        | 340                                         |
|         | TMTU        | -                                           |
| cPtM    | TU          | 340                                         |
|         | DMTU        | 340                                         |
|         |             | -                                           |
| cPtR    | TU          | 340                                         |
|         | DMTU        | 340                                         |
| tPt     | TU          | 330                                         |
|         | DMTU        | 330                                         |
|         | TMTU        | 345                                         |
| tPtM    | TU          | 330                                         |
|         | DMTU        | 330                                         |
|         | TMTU        | 345                                         |
| tPtR    | TU          | 330                                         |
|         | DMTU        | 330                                         |
|         | TMTU        | 360                                         |

### Supplementary Tables and Figures for the *cis* complexes

**Table S2** Average observed rate constants,  $k_{\text{obs}}$ ,  $\text{s}^{-1}$ , for the displacement of the aqua ligands in **cPt** with the nucleophiles, at  $\text{pH} = 2.0$ ,  $T = 298.15 \text{ K}$ ,  $I = 0.1 \text{ M NaClO}_4$ .

| TU       |                                  | DMTU     |                                  |
|----------|----------------------------------|----------|----------------------------------|
| Conc., M | $k_{\text{obs}} (\text{s}^{-1})$ | Conc., M | $k_{\text{obs}} (\text{s}^{-1})$ |
| 0.15     | 0.01499                          | 0.15     | 0.00670                          |
| 0.30     | 0.02933                          | 0.30     | 0.01340                          |
| 0.45     | 0.04452                          | 0.45     | 0.01958                          |
| 0.60     | 0.05835                          | 0.60     | 0.02653                          |
| 0.75     | 0.07286                          | 0.75     | 0.03320                          |

**Table S3** Average observed rate constants,  $k_{\text{obs}}$ ,  $\text{s}^{-1}$ , for the displacement of the ammine ligands in **cPt** with the nucleophiles, at  $\text{pH} = 2.0$ ,  $T = 298.15 \text{ K}$ ,  $I = 0.1 \text{ M NaClO}_4$ .

| TU       |                                  | DMTU     |                                  |
|----------|----------------------------------|----------|----------------------------------|
| Conc., M | $k_{\text{obs}} (\text{s}^{-1})$ | Conc., M | $k_{\text{obs}} (\text{s}^{-1})$ |
| 0.15     | 0.00325                          | 0.15     | 0.00134                          |
| 0.30     | 0.00652                          | 0.30     | 0.00264                          |
| 0.45     | 0.00960                          | 0.45     | 0.00386                          |
| 0.60     | 0.01283                          | 0.60     | 0.00515                          |
| 0.75     | 0.01598                          | 0.75     | 0.00647                          |

**Table S4** Temperature dependence of  $k_2/\text{M}^{-1}\text{s}^{-1}$ , for the displacement of the aqua ligands in **cPt** by the nucleophiles at 60-fold at  $\text{pH} = 2.0$ ,  $I = 0.1 \text{ M NaClO}_4$

| TU                    |              | DMTU                  |              |
|-----------------------|--------------|-----------------------|--------------|
| $1/T (\text{K}^{-1})$ | $\ln(k_2/T)$ | $1/T (\text{K}^{-1})$ | $\ln(k_2/T)$ |
| 0.00341               | -8.1305      | 0.00341               | -9.1597      |
| 0.00336               | -8.0104      | 0.00336               | -8.8318      |
| 0.00330               | -7.8947      | 0.00330               | -8.5148      |
| 0.00325               | -7.7830      | 0.00325               | -8.2083      |
| 0.00319               | -7.6751      | 0.00319               | -7.9118      |

**Table S5** Temperature dependence of  $k_2/\text{M}^{-1}\text{s}^{-1}$ , for the displacement of the ammine ligands in **cPt** by the nucleophiles at 60-fold at  $\text{pH} = 2.0$ ,  $I = 0.1 \text{ M NaClO}_4$

| TU                    |              | DMTU                  |              |
|-----------------------|--------------|-----------------------|--------------|
| $1/T (\text{K}^{-1})$ | $\ln(k_2/T)$ | $1/T (\text{K}^{-1})$ | $\ln(k_2/T)$ |
| 0.00341               | -9.9427      | 0.00341               | -10.8448     |
| 0.00336               | -9.5446      | 0.00336               | -10.4549     |
| 0.00330               | -9.1598      | 0.00330               | -10.0780     |
| 0.00325               | -8.7900      | 0.00325               | -9.71380     |
| 0.00319               | -8.4279      | 0.00319               | -9.36140     |

**Table S6** Average observed rate constants,  $k_{\text{obs}}$ ,  $\text{s}^{-1}$ , for the displacement of the aqua ligands in **cPtM** with the nucleophiles, at  $\text{pH} = 2.0$ ,  $T = 298.15 \text{ K}$ ,  $I = 0.1 \text{ M NaClO}_4$ .

| TU       |                                      | DMTU     |                                      |
|----------|--------------------------------------|----------|--------------------------------------|
| Conc., M | $k_{\text{obs}}$ ( $\text{s}^{-1}$ ) | Conc., M | $k_{\text{obs}}$ ( $\text{s}^{-1}$ ) |
| 0.15     | 0.00895                              | 0.15     | 0.00590                              |
| 0.30     | 0.01729                              | 0.30     | 0.01199                              |
| 0.45     | 0.02593                              | 0.45     | 0.01809                              |
| 0.60     | 0.03505                              | 0.60     | 0.02379                              |
| 0.75     | 0.04385                              | 0.75     | 0.02993                              |

**Table S7** Average observed rate constants,  $k_{\text{obs}}$ ,  $\text{s}^{-1}$ , for the displacement of the amine ligands in **cPtM** with the nucleophiles, at  $\text{pH} = 2.0$ ,  $T = 298.15 \text{ K}$ ,  $I = 0.1 \text{ M NaClO}_4$ .

| TU       |                                      | DMTU     |                                      |
|----------|--------------------------------------|----------|--------------------------------------|
| Conc., M | $k_{\text{obs}}$ ( $\text{s}^{-1}$ ) | Conc., M | $k_{\text{obs}}$ ( $\text{s}^{-1}$ ) |
| 0.15     | 0.00122                              | 0.15     | 5.40E-4                              |
| 0.30     | 0.00243                              | 0.30     | 0.00113                              |
| 0.45     | 0.00364                              | 0.45     | 0.00171                              |
| 0.60     | 0.00488                              | 0.60     | 0.00225                              |
| 0.75     | 0.00615                              | 0.75     | 0.00281                              |

**Table S8** Temperature dependence of  $k_2/\text{M}^{-1}\text{s}^{-1}$ , for the displacement of the aqua ligands in **cPtM** by the nucleophiles at 60-fold at  $\text{pH} = 2.0$ ,  $I = 0.1 \text{ M NaClO}_4$

| TU                      |              | DMTU                    |              |
|-------------------------|--------------|-------------------------|--------------|
| 1/T ( $\text{K}^{-1}$ ) | $\ln(k_2/T)$ | 1/T ( $\text{K}^{-1}$ ) | $\ln(k_2/T)$ |
| 0.00341                 | -8.8020      | 0.00341                 | -9.3005      |
| 0.00336                 | -8.3909      | 0.00336                 | -8.9110      |
| 0.00330                 | -7.9640      | 0.00330                 | -8.5312      |
| 0.00325                 | -7.5864      | 0.00325                 | -8.1324      |
| 0.00319                 | -7.2285      | 0.00319                 | -7.8063      |

**Table S9** Temperature dependence of  $k_2/\text{M}^{-1}\text{s}^{-1}$ , for the displacement of the amine ligands in **cPtM** by the nucleophiles at 60-fold at  $\text{pH} = 2.0$ ,  $I = 0.1 \text{ M NaClO}_4$

| TU                      |              | DMTU                    |              |
|-------------------------|--------------|-------------------------|--------------|
| 1/T ( $\text{K}^{-1}$ ) | $\ln(k_2/T)$ | 1/T ( $\text{K}^{-1}$ ) | $\ln(k_2/T)$ |
| 0.00341                 | -10.9030     | 0.00341                 | -11.7030     |
| 0.00336                 | -10.3744     | 0.00336                 | -11.2698     |
| 0.00330                 | -9.87140     | 0.00330                 | -10.8223     |
| 0.00325                 | -9.39450     | 0.00325                 | -10.3786     |
| 0.00319                 | -9.01460     | 0.00319                 | -10.0246     |



**Table S10** Average observed rate constants,  $k_{\text{obs}}$ ,  $\text{s}^{-1}$ , for the displacement of the aqua ligands in **cPtR** with the nucleophiles, at  $\text{pH} = 2.0$ ,  $T = 298.15 \text{ K}$ ,  $I = 0.1 \text{ M NaClO}_4$ .

| TU       |                                  | DMTU     |                                  |
|----------|----------------------------------|----------|----------------------------------|
| Conc., M | $k_{\text{obs}} (\text{s}^{-1})$ | Conc., M | $k_{\text{obs}} (\text{s}^{-1})$ |
| 0.15     | 4.13E-4                          | 0.15     | 2.9965E-4                        |
| 0.30     | 8.26E-4                          | 0.30     | 5.9930E-4                        |
| 0.45     | 0.00130                          | 0.45     | 8.8401E-4                        |
| 0.60     | 0.00173                          | 0.60     | 0.0011202                        |
| 0.75     | 0.00210                          | 0.75     | 0.0014010                        |

**Table S11** Temperature dependence of  $k_2/\text{M}^{-1}\text{s}^{-1}$ , for the displacement of the aqua ligands in **cPtR** by the nucleophiles at 60-fold at  $\text{pH} = 2.0$ ,  $I = 0.1 \text{ M NaClO}_4$

| TU                      |              | DMTU                    |              |
|-------------------------|--------------|-------------------------|--------------|
| 1/T ( $\text{K}^{-1}$ ) | $\ln(k_2/T)$ | 1/T ( $\text{K}^{-1}$ ) | $\ln(k_2/T)$ |
| 0.00341                 | -11.9710     | 0.00341                 | -12.3101     |
| 0.00336                 | -11.5880     | 0.00336                 | -11.9296     |
| 0.00330                 | -11.2390     | 0.00330                 | -11.5530     |
| 0.00325                 | -10.8831     | 0.00325                 | -11.1736     |
| 0.00319                 | -10.5320     | 0.00319                 | -10.8420     |

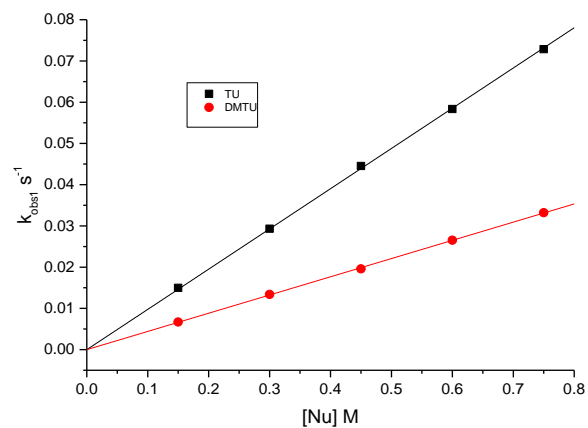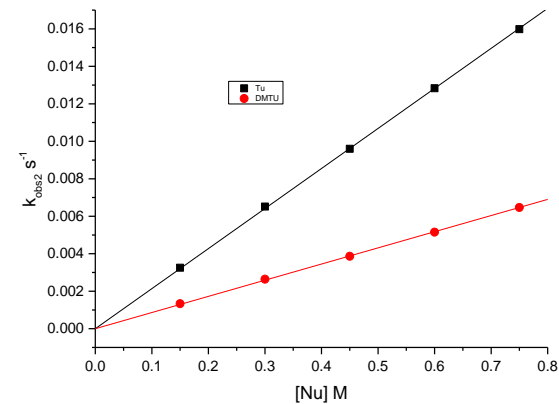

**Fig. S11** Dependence of the *pseudo* first-order rate constants ( $k_{obs}$ ) on the concentrations of the nucleophiles for the aqua and ammine substitution for **cPt** in  $NaClO_4$  ( $I = 0.1$  M) at 298.15 K.

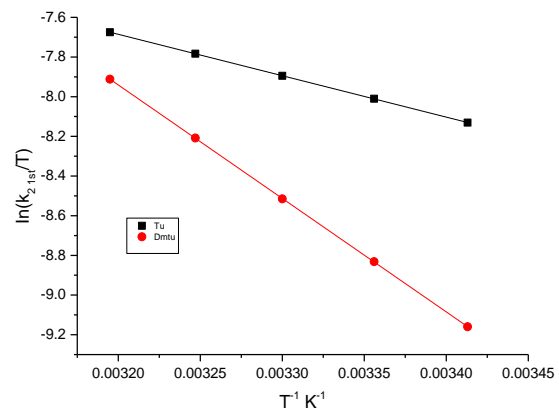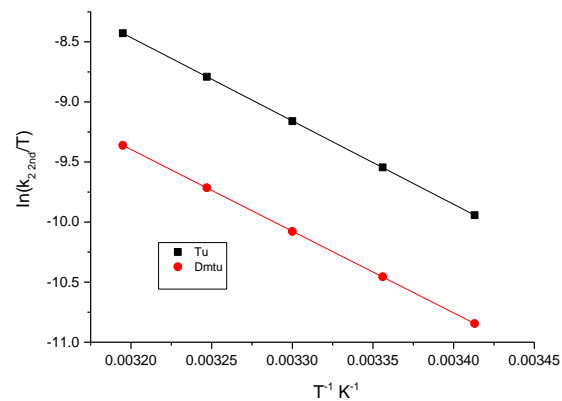

**Fig. S12** Eyring plots obtained for **cPt** with the nucleophiles for the substitution reactions over the temperature range 293.15 – 313.15 K in  $NaClO_4$  ( $I = 0.1$  M).

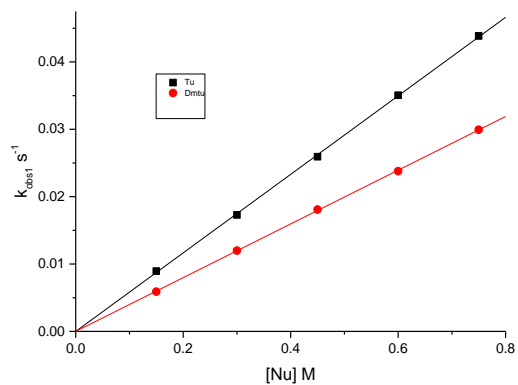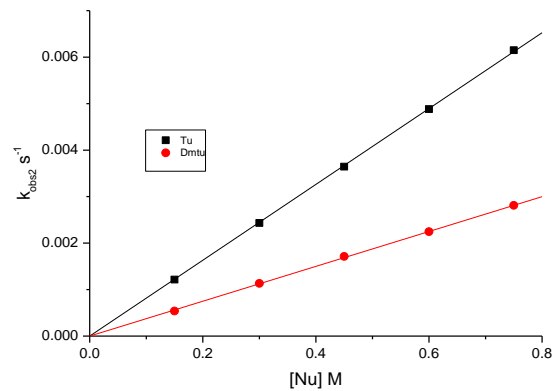

**Fig. S13** Dependence of the *pseudo* first-order rate constants ( $k_{\text{obs}}$ ) on the concentrations of the nucleophiles for the aqua and ammine substitution for **cPtM** in  $\text{NaClO}_4$  ( $I = 0.1 \text{ M}$ ) at  $298.15 \text{ K}$ .

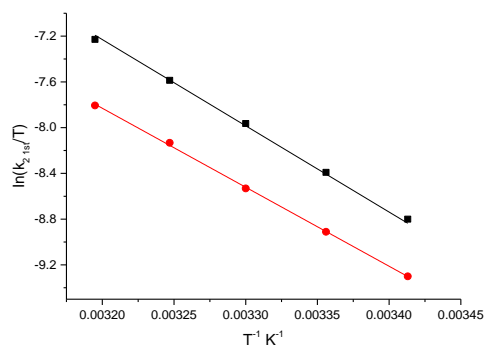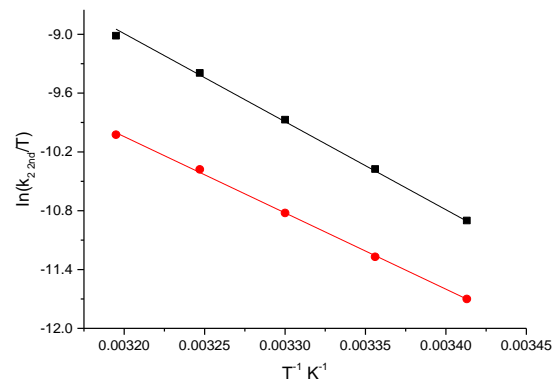

**Fig. S14** Eyring plots obtained for **cPtM** with the nucleophiles for the substitution reactions over the temperature range  $293.15 - 313.15 \text{ K}$  in  $\text{NaClO}_4$  ( $I = 0.1 \text{ M}$ ).

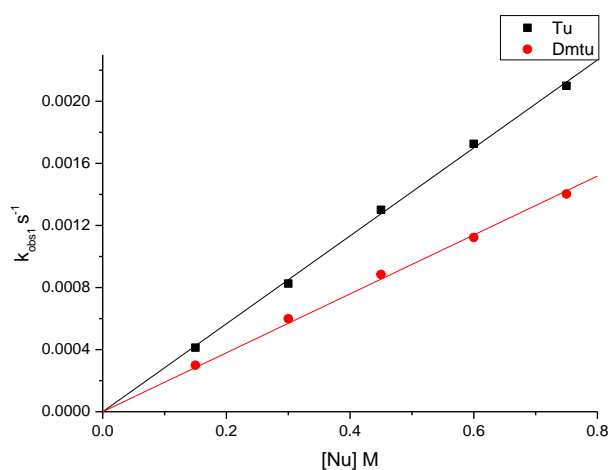

**Fig. S15** Dependence of the *pseudo* first-order rate constants ( $k_{obs}$ ) on the concentrations of the nucleophiles for the aqua substitution for **cPtR** in  $\text{NaClO}_4$  ( $I = 0.1 \text{ M}$ ) at  $298.15 \text{ K}$ .

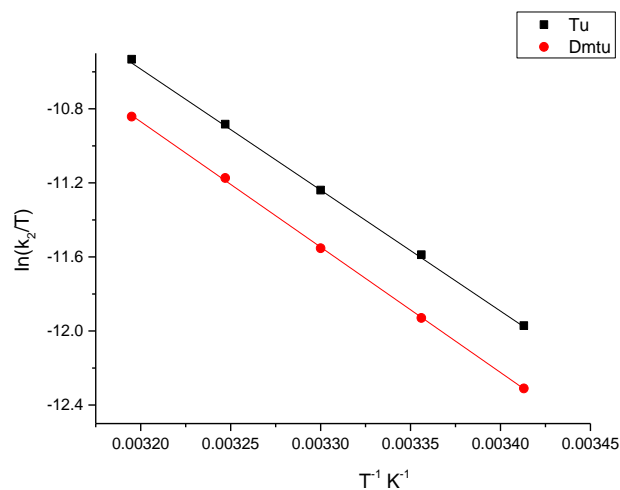

**Fig. S16** Eyring plots obtained for **cPtR** with the nucleophiles for the substitution reactions over the temperature range  $293.15 - 313.15 \text{ K}$  in  $\text{NaClO}_4$  ( $I = 0.1 \text{ M}$ )

### Supplementary Tables and Figures for the *trans* complexes

**Table S12** Average observed rate constants,  $k_{obs}$ ,  $\text{s}^{-1}$ , for the displacement of the aqua ligands in **tPt** with the nucleophiles, at  $\text{pH} = 2.0$ ,  $T = 298.15 \text{ K}$ ,  $I = 0.1 \text{ M NaClO}_4$ .

| TU       |                               | DMTU     |                               | TMTU     |                               |
|----------|-------------------------------|----------|-------------------------------|----------|-------------------------------|
| Conc., M | $k_{obs}$ ( $\text{s}^{-1}$ ) | Conc., M | $k_{obs}$ ( $\text{s}^{-1}$ ) | Conc., M | $k_{obs}$ ( $\text{s}^{-1}$ ) |
| 0.02     | 0.88570                       | 0.02     | 0.44470                       | 0.02     | 0.11560                       |
| 0.04     | 1.76139                       | 0.04     | 0.88944                       | 0.04     | 0.22301                       |
| 0.06     | 2.65197                       | 0.06     | 1.36503                       | 0.06     | 0.33463                       |
| 0.08     | 3.54107                       | 0.08     | 1.83272                       | 0.08     | 0.44624                       |
| 0.10     | 4.42689                       | 0.10     | 2.30257                       | 0.10     | 0.55780                       |

**Table 13** Temperature dependence of  $k_2/M^{-1}s^{-1}$ , for the displacement of the aqua ligands in **tPt** by the nucleophiles at 60-fold at pH = 2.0,  $I = 0.1$  M NaClO<sub>4</sub>

| TU                     |               | DMTU                   |               | TMTU                   |               |
|------------------------|---------------|------------------------|---------------|------------------------|---------------|
| 1/T (K <sup>-1</sup> ) | ln( $k_2/T$ ) | 1/T (K <sup>-1</sup> ) | ln( $k_2/T$ ) | 1/T (K <sup>-1</sup> ) | ln( $k_2/T$ ) |
| 0.00341                | -5.3765       | 0.00341                | -5.9580       | 0.00341                | -7.5010       |
| 0.00336                | -4.9525       | 0.00336                | -5.5682       | 0.00336                | -7.0386       |
| 0.00330                | -4.4827       | 0.00330                | -5.2301       | 0.00330                | -6.5803       |
| 0.00325                | -4.1163       | 0.00325                | -4.8681       | 0.00325                | -6.1379       |
| 0.00319                | -3.7560       | 0.00319                | -4.5157       | 0.00319                | -5.7141       |

**Table S14** Average observed rate constants,  $k_{obs}, s^{-1}$ , for the displacement of the aqua ligands in **tPtM** with the nucleophiles, at pH = 2.0,  $T = 298.15$  K,  $I = 0.1$  M NaClO<sub>4</sub>.

| TU       |                    | DMTU     |                    | TMTU     |                    |
|----------|--------------------|----------|--------------------|----------|--------------------|
| Conc., M | $k_{obs} (s^{-1})$ | Conc., M | $k_{obs} (s^{-1})$ | Conc., M | $k_{obs} (s^{-1})$ |
| 0.02     | 0.70761            | 0.02     | 0.35958            | 0.02     | 0.07501            |
| 0.04     | 1.38197            | 0.04     | 0.72830            | 0.04     | 0.15287            |
| 0.06     | 2.12432            | 0.06     | 1.09171            | 0.06     | 0.21985            |
| 0.08     | 2.83238            | 0.08     | 1.45619            | 0.08     | 0.30406            |
| 0.10     | 3.54455            | 0.10     | 1.81803            | 0.10     | 0.38153            |

**Table S15** Temperature dependence of  $k_2/M^{-1}s^{-1}$ , for the displacement of the aqua ligands in **tPtM** by the nucleophiles at 60-fold at pH = 2.0,  $I = 0.1$  M NaClO<sub>4</sub>

| TU                     |               | DMTU                   |               | TMTU                   |               |
|------------------------|---------------|------------------------|---------------|------------------------|---------------|
| 1/T (K <sup>-1</sup> ) | ln( $k_2/T$ ) | 1/T (K <sup>-1</sup> ) | ln( $k_2/T$ ) | 1/T (K <sup>-1</sup> ) | ln( $k_2/T$ ) |
| 0.00341                | -5.50310      | 0.00341                | -6.40301      | 0.00341                | -7.49021      |
| 0.00336                | -5.16405      | 0.00336                | -5.98240      | 0.00336                | -7.18778      |
| 0.00330                | -4.81410      | 0.00330                | -5.60226      | 0.00330                | -6.79401      |
| 0.00325                | -4.30090      | 0.00325                | -5.20010      | 0.00325                | -6.39420      |
| 0.00319                | -3.90790      | 0.00319                | -4.78801      | 0.00319                | -5.99961      |

**Table S16** Average observed rate constants,  $k_{obs}, s^{-1}$ , for the displacement of the aqua ligands in **tPtR** with the nucleophiles, at pH = 2.0,  $T = 298.15$  K,  $I = 0.1$  M NaClO<sub>4</sub>.

| TU       |                    | DMTU     |                    | TMTU     |                    |
|----------|--------------------|----------|--------------------|----------|--------------------|
| Conc., M | $k_{obs} (s^{-1})$ | Conc., M | $k_{obs} (s^{-1})$ | Conc., M | $k_{obs} (s^{-1})$ |
| 0.02     | 0.37915            | 0.02     | 0.20575            | 0.02     | 0.04475            |
| 0.04     | 0.75827            | 0.04     | 0.41151            | 0.04     | 0.08950            |
| 0.06     | 1.13741            | 0.06     | 0.61726            | 0.06     | 0.13218            |
| 0.08     | 1.51701            | 0.08     | 0.82302            | 0.08     | 0.17771            |
| 0.10     | 1.89550            | 0.10     | 1.02877            | 0.10     | 0.22382            |

**Table S17** Temperature dependence of  $k_2/M^{-1}s^{-1}$ , for the displacement of the aqua ligands in **tPtR** by the nucleophiles at 60-fold at pH = 2.0,  $I = 0.1$  M NaClO<sub>4</sub>

| TU                     |                       | DMTU                   |                       | TMTU                   |                       |
|------------------------|-----------------------|------------------------|-----------------------|------------------------|-----------------------|
| 1/T (K <sup>-1</sup> ) | ln(k <sub>2</sub> /T) | 1/T (K <sup>-1</sup> ) | ln(k <sub>2</sub> /T) | 1/T (K <sup>-1</sup> ) | ln(k <sub>2</sub> /T) |
| 0.00341                | -3.10426              | 0.00341                | -3.72431              | 0.00341                | -5.31546              |
| 0.00336                | -2.75497              | 0.00336                | -3.36618              | 0.00336                | -4.90727              |
| 0.00330                | -2.31217              | 0.00330                | -2.97527              | 0.00330                | -4.54127              |
| 0.00325                | -2.01889              | 0.00325                | -2.69267              | 0.00325                | -4.14127              |
| 0.00319                | -1.56808              | 0.00319                | -2.28466              | 0.00319                | -3.82437              |

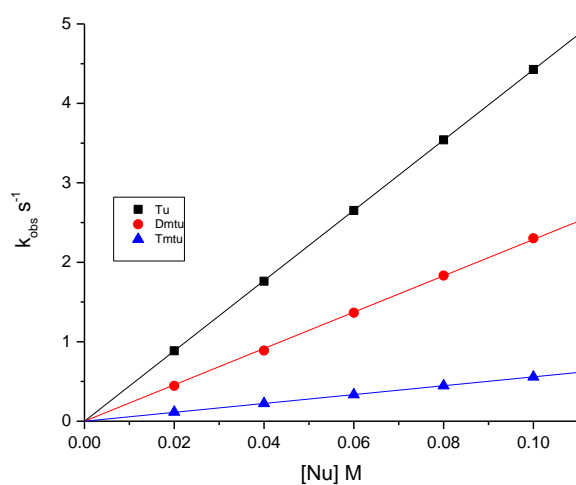

**Fig. S17** Dependence of the *pseudo* first-order rate constants ( $k_{obs}$ ) on the concentrations of the nucleophiles for the aqua substitution for **tPt** in NaClO<sub>4</sub> ( $I = 0.1$  M) at 298.15 K.

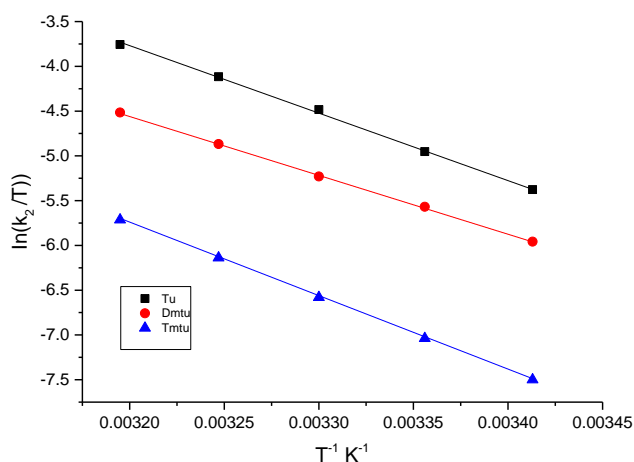

**Fig. S18** Eyring plots obtained for **tPt** with the nucleophiles for the substitution reactions over the temperature range 293.15 – 313.15 K in NaClO<sub>4</sub> ( $I = 0.1$  M)

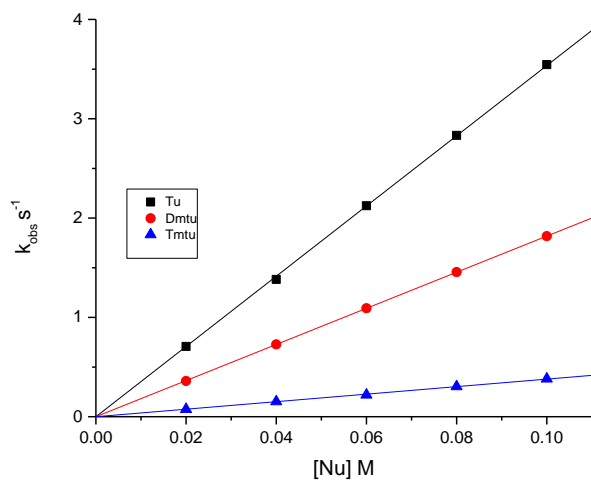

**Fig. S19** Dependence of the *pseudo* first-order rate constants ( $k_{\text{obs}}$ ) on the concentrations of the nucleophiles for the aqua substitution for **tPtM** in  $\text{NaClO}_4$  ( $I = 0.1$  M) at  $298.15$  K.

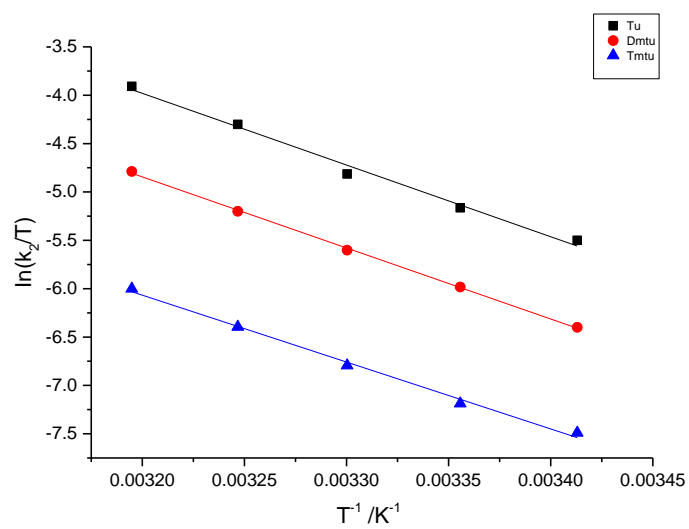

**Fig. S20** Eyring plots obtained for **tPtM** with the nucleophiles for the substitution reactions over the temperature range  $293.15$  –  $313.15$  K in  $\text{NaClO}_4$  ( $I = 0.1$  M)

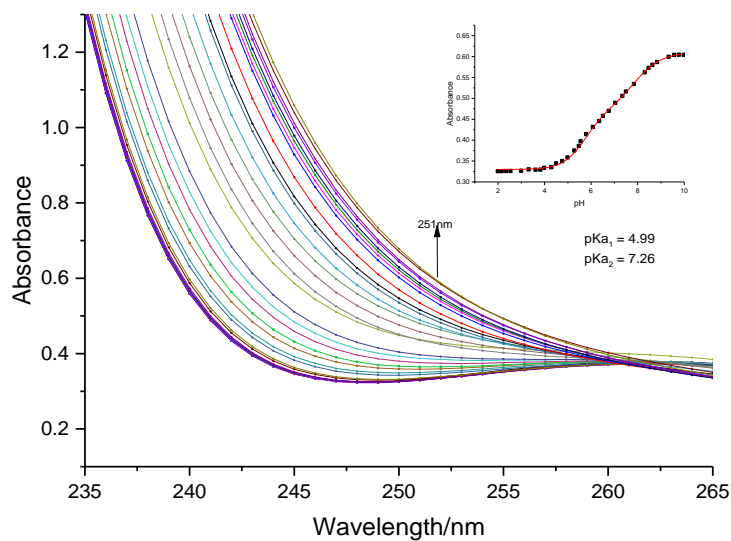

**Fig. S21** Determination of pK<sub>a</sub> values for cPt using Boltzmann equation from the sigmoid curve at the inflection point

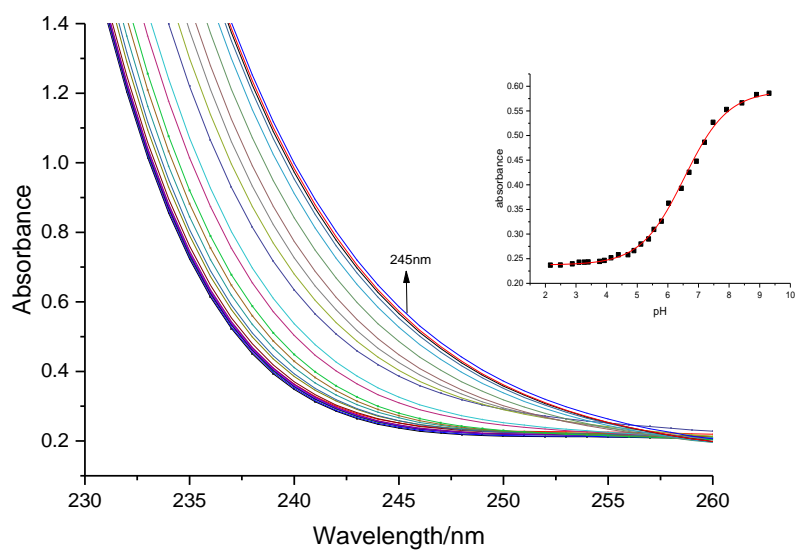

**Fig. S22** Determination of pK<sub>a</sub> values for cPtM using Boltzmann equation from the sigmoid curve at the inflection point
